# Supplementary material for: Comparison of image registration methods for combining laparoscopic video and spectral image data
Source: PubMed Central journal article supplement (PMC9525266; doi:10.1038/s41598-022-20816-1), 2022-09-30

## 0. Manual registration of the two image sensors (only once)

|                                                                                   |                                                                                   |                                                                                    |
|-----------------------------------------------------------------------------------|-----------------------------------------------------------------------------------|------------------------------------------------------------------------------------|
| Image from color sensor                                                           | RGB image from HSI                                                                | Transformed HSI data                                                               |
|  |  |  |
| * $H =$                                                                           |                                                                                   |                                                                                    |
| Least square solution for $H$ with RANSAC (SH)                                    |                                                                                   |                                                                                    |

## 1. Preprocessing, keypoint detection and matching in masked color images

|                                                                                     |                                                                                    |                                                                                                       |
|-------------------------------------------------------------------------------------|------------------------------------------------------------------------------------|-------------------------------------------------------------------------------------------------------|
| <b>a) Image during HSI record</b>                                                   | Green channel, Glare mask, Smoothing, CLAHE                                        | Detect 1000 keypoints in mask, compute descriptors (ORB1000)                                          |
|    |   |                     |
| <b>b) Video images</b>                                                              |                                                                                    |                                                                                                       |
|   |  |                    |
| <b>c) Keypoint matching</b>                                                         |                                                                                    |                                                                                                       |
|  |                                                                                    | Brute-Force matching (Hamming norm) of descriptors with cross-check and selection of 20% best matches |

## 2. Calculation of transformation matrices from point pairs

### a) Perspective transformation (SH)

Least square solution  $H$  for point pairs of best matches with RANSAC

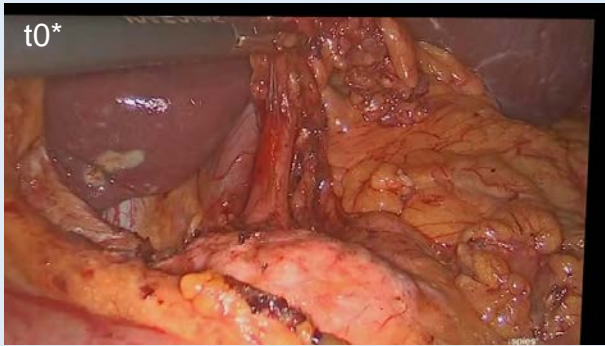

### b) Multi-homography or deformation method (here MLS affine deformation)

Find affine transformation for each point with moving least squares minimization

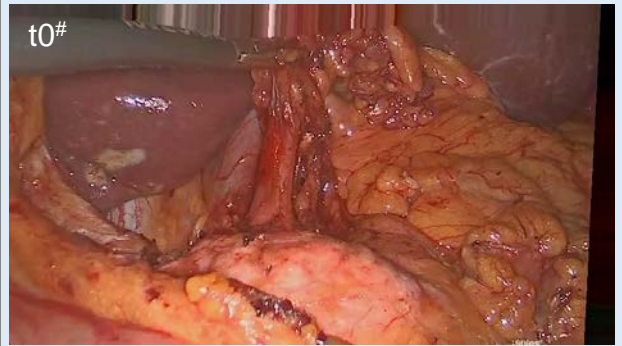

## 3. Overlay of HSI data on video

### a) Select transformation with smallest error for each pixel

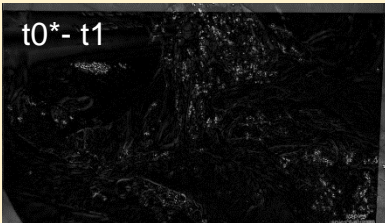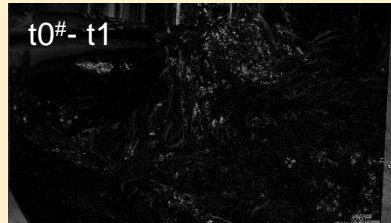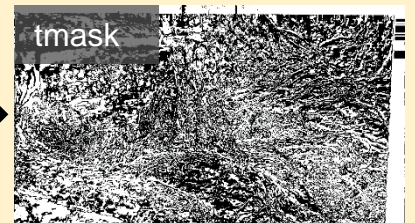

### b) Add masked perspective and MLS transformation of HSI data

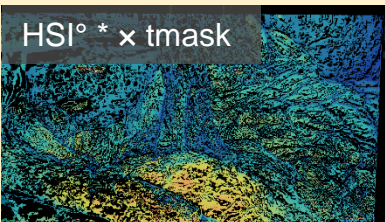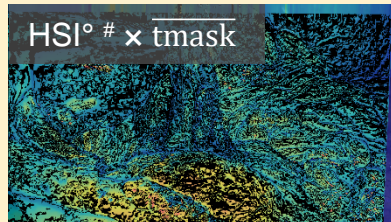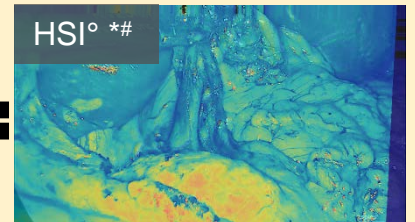

### c) Add masked error images, threshold and median filter

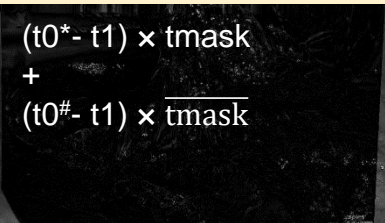

1. < Error threshold
2. Median filter

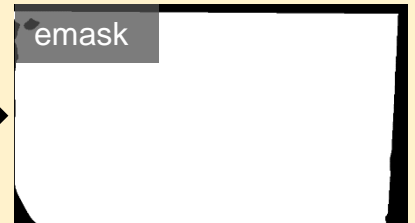

### d) Add masked video and HSI data

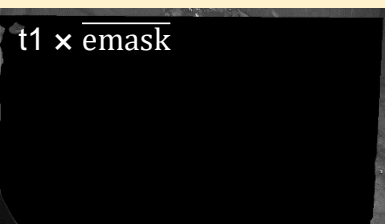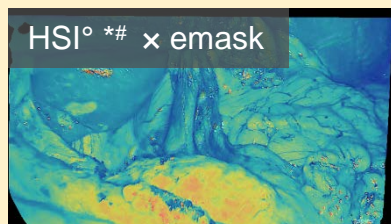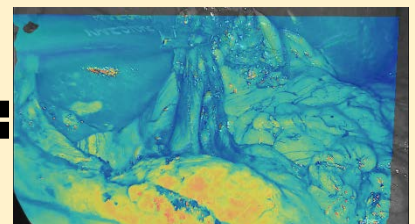

Supplement: 41598_2022_20816_MOESM3_ESM.pdf [file 41598_2022_20816_MOESM3_ESM.pdf]
